# Supplementary material
Source: PubMed Central journal article supplement (PMC5766358)
Supplement: NIHMS911049-supplement-SI.pdf [file NIHMS911049-supplement-SI.pdf]

# An engineered probiotic for the inhibition of *Salmonella* via tetrathionate-induced production of microcin H47

## Supplementary Information

**Authors:** Jacob D. Palmer<sup>1</sup>, Emma Piattelli<sup>2</sup>, Beth A. McCormick<sup>3,4</sup>, Mark W. Silby<sup>2,5</sup>, Christopher J. Brigham<sup>1,5</sup>, Vanni Bucci<sup>2,4,\*</sup>

**Author affiliation:** <sup>1</sup>Department of Bioengineering, University of Massachusetts Dartmouth. <sup>2</sup>Department of Biology, University of Massachusetts Dartmouth. <sup>3</sup>MaPS, University of Massachusetts Medical School. <sup>4</sup>UMass Center for Microbiome Research. <sup>5</sup>Umass Dartmouth Probiotic Discovery, Engineering and Manufacturing Center.

**Corresponding author:** Vanni Bucci

**Contact:** Department of Biology, University of Massachusetts Dartmouth, 285 Old Westport Road, N. Dartmouth, MA 02747

**Phone:** 508-999-8219

**Email:** vbucci@umassd.edu

**Table of Contents:**

**Figure S1:** Comparison of *E. coli* Nissle 1917 pBR322 and *E. coli* NEB10 $\beta$  harboring the l-rhamnose dependent microcin H47 production plasmid (pJPMcH47) in inhibiting *E. coli* strain DH5 $\alpha$  and *S. Typhimurium* ..... S3

**Figure S2:** Comparison of *E. coli* Nissle 1917 pBR322 and *E. coli* Nissle 1917 pJPMcH47 in inhibiting *E. coli* strain DH5 $\alpha$  and *S. Typhimurium* in presence and absence of 0.2mM 2,2'-dipyridyl ..... S4

**Figure S3:** Growth curves in LB media under anaerobic conditions with 0.2mM 2,2'-dipyridyl ..... S5

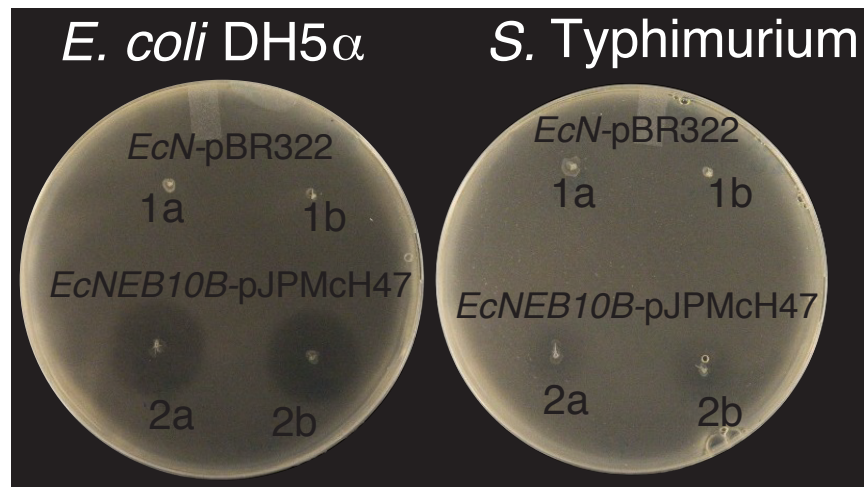

**Figure S1:** Comparison of *E. coli* Nissle 1917 pBR322 and *E. coli* NEB10 $\beta$  harboring the l-rhamnose dependent microcin H47 production plasmid (pJPMcH47) in inhibiting *E. coli* strain DH5 $\alpha$  (left) and *S. Typhimurium* (right). This experiment demonstrates MccH47-based inhibition without chromosomal *mch* genes.

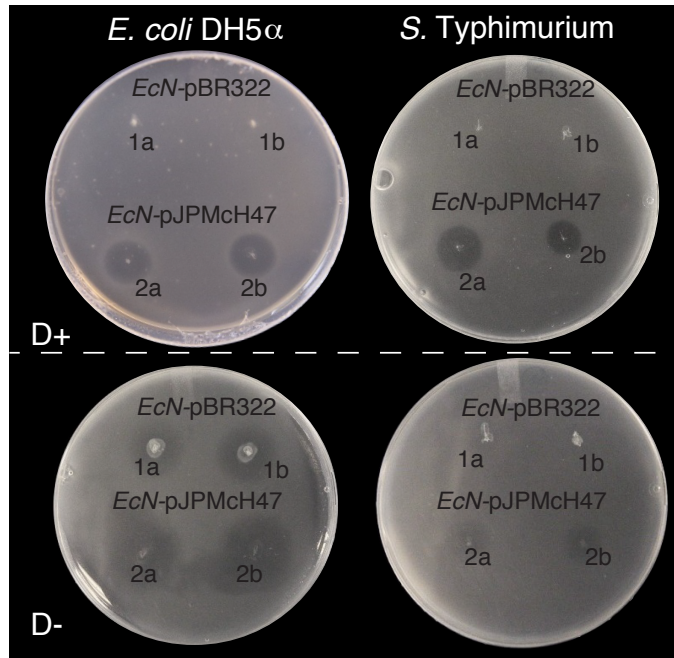

**Figure S2:** Comparison of *E. coli* Nissle 1917 pBR322 and *E. coli* Nissle 1917 pJPMcH47 in inhibiting *E. coli* strain DH5 $\alpha$  (left) and *S. Typhimurium* (right) in presence (D+ top) and absence (D- bottom) of 0.2mM 2,2'-dipyridyl. This experiment demonstrates that iron-limitation is required for maximum MccH47 inhibition. Interestingly, against in not iron-limiting conditions *E. coli* Nissle 1917 inhibits both strains likely through some other not MccH47-related mechanism.

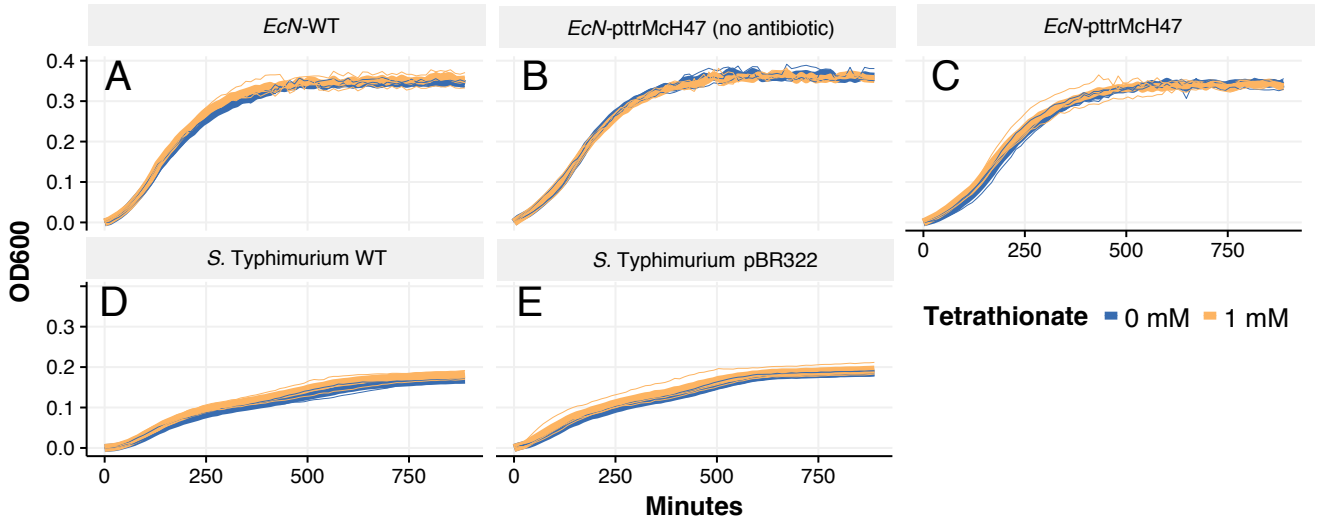

**Figure S3:** Growth curves in LB media under anaerobic conditions with 0.2mM 2,2'-dipyridyl for (A) *E. coli* Nissle 1917 (*EcN*) WT, (B) *EcN* pptrMcH47 without carbenicillin and (C) *EcN* pptrMcH47 with 100 $\mu$ g/mL carbenicillin, (D) *S. Typhimurium* WT and (E) *S. Typhimurium* pBR322 with 100 $\mu$ g/mL carbenicillin. No significant difference in growth dynamics (maximum growth rate) was observed between 0mM and 1mM potassium tetrathionate. Maximum growth rate was estimated using the R package “grofit” and fitting a spline model to the data.
